# Supplementary material
Source: PubMed Central journal article supplement (PMC3458458)
Supplement: ASN.2012010048_ASN2012010048SupplementaryData.pdf [file ASN.2012010048_ASN2012010048SupplementaryData.pdf]

## Supplementary data

| Target gene (genotyping)     | Forward                                    | Reverse                                 |
|------------------------------|--------------------------------------------|-----------------------------------------|
| Klotho-LoxP                  | TTG TCA ATA TGT AAA TAA TTT GAG CAG TAG GG | GTT GTT GAA AGA GGG AGC TAG TGG TAG TTA |
| KSP-cre                      | AGG TTC GTG CAC TCA TGG A                  | TCG ACC AGT TTA GTT ACC C               |
| Target gene (real time qPCR) | Forward                                    | Reverse                                 |
| $\beta$ -actin               | CCG TAA AGA CCT CTA TGC CAA CAC            | GAG CCA CCG ATC CAC ACA GA              |
| CaSR                         | CTG TTT TGA GTG TGT GGA GTG T              | TCA TCC GGG CAC TTG TCA                 |
| Cyp24A1                      | TGG GCT CTA GCG AAG ACA AT                 | GGT ACC AGG ATG CCA AGA TG              |
| Cyp27B1                      | CCC AAG ATA CGC TAG TCT CCC TA             | TGG GTC AAG ATC TGG GAC AAA G           |
| FGFR1                        | AAC CTC TAA CCG CAG AAC                    | GAG ACT CCA CTT CCA CAG                 |
| Klotho                       | TGT ATG TGA CAG CCA ATG GAA TCG            | GAA TAC GCA AAG TAG CCA CAA AGG         |
| Npt2a                        | GCT GTC CTC TAC CTG CTC GTG TG             | GCG TGC CCA CTC CGA CCA TAG             |
| Npt2c                        | CGT GCG GAC TGT TAT CAA TG                 | TAC TGG GCA GTC AGG TTT CC              |
| TRPV5                        | GCC TCG CTC TGG TAT CTG TGG                | TCT GCT CCT GGT GGT GTT CAA C           |
| VDR                          | ACA GGG AGC TAT TCT CCA AGG                | TTC AGA TCC ATC GTG GAA AAG             |

**Table 1.** Sequences of the primers used for genotyping and real time qPCR.
